# Supplementary material
Source: bioRxiv or medRxiv preprint supplement (https://www.biorxiv.org/highwire/filestream/44378/field_highwire_adjunct_files/7/149336-8.pdf)

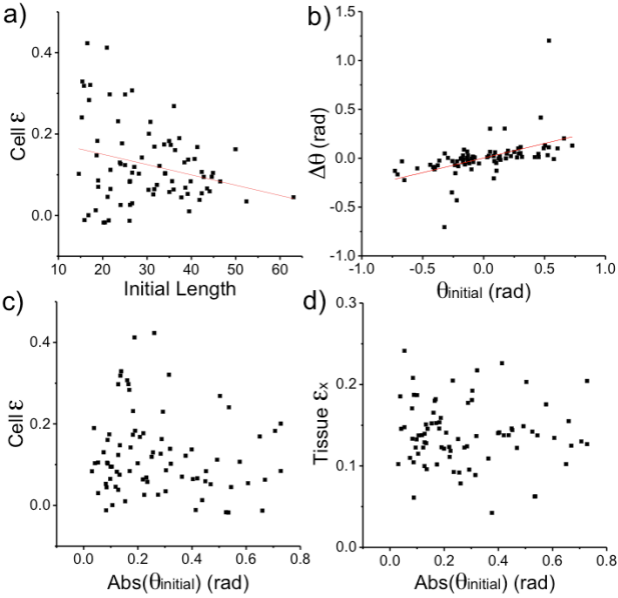

Supplement: Supplementary file [file 149336-8.pdf]
